# Supplementary material
Source: HighWire-hosted journal article supplement (https://erj.ersjournals.com/content/52/3/1702314)

Supplementary Figure 2

GDP

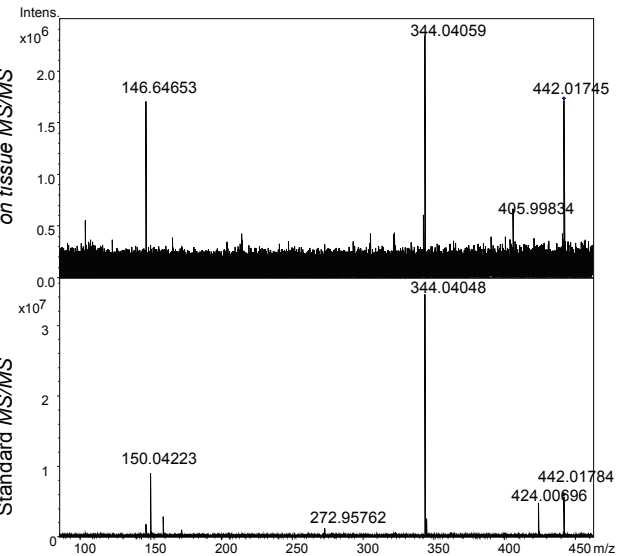

GTP

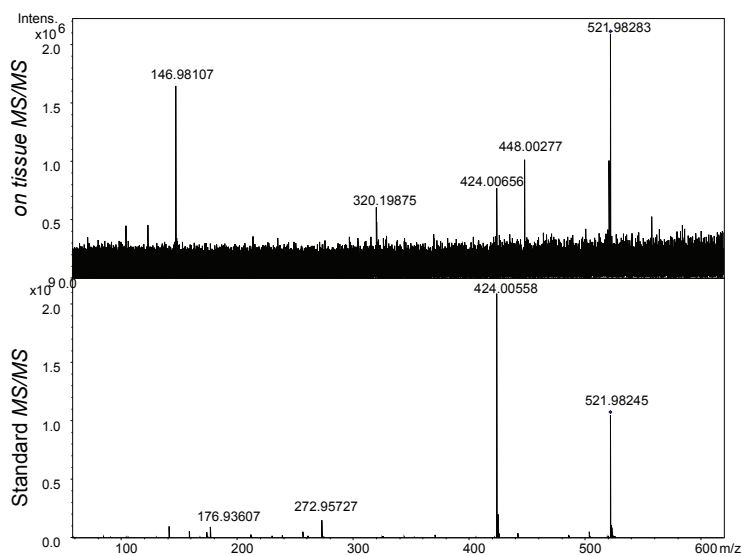

UTP

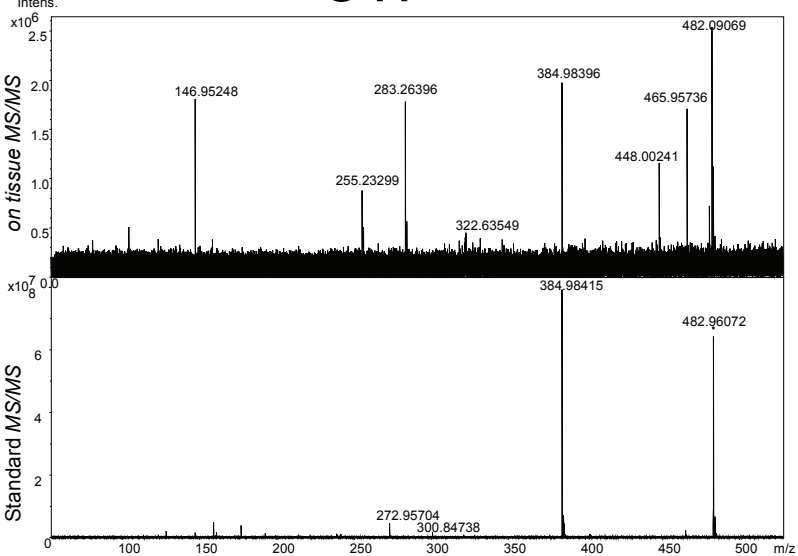

Supplement: inline-supplementary-material-4 [file inline-supplementary-material-4.pdf]
