# Supplementary material
Source: HighWire-hosted journal article supplement (https://erj.ersjournals.com/content/52/3/1702314)
Supplement: inline-supplementary-material-5 [file inline-supplementary-material-5.pdf]

| <b>Donor</b>                           |                                |                          |                    |                             |                            |            |            |  |
|----------------------------------------|--------------------------------|--------------------------|--------------------|-----------------------------|----------------------------|------------|------------|--|
| Age                                    | 53                             | 29                       | 60                 | 37                          |                            |            |            |  |
| Gender                                 | M                              | M                        | M                  | F                           |                            |            |            |  |
| Reason of rejection                    | Recipient dying                | Contusion                | Beginning fibrosis | Emboli                      |                            |            |            |  |
| Smoking                                | No but alcohol abuse/cirrhosis | No but drugs and alcohol | NA                 | No but IV drugs and alcohol |                            |            |            |  |
| NHBD                                   | 0                              | 1                        | 0                  | 0                           |                            |            |            |  |
| Cause of death                         | CVA                            | Subdural hematoma        | CVA                | CVA                         |                            |            |            |  |
| PO2                                    | 468                            | 360                      | 386                | 407                         |                            |            |            |  |
| <b>IPF</b>                             | <b>Untreated</b>               |                          |                    |                             | <b>Pirfenidone treated</b> |            |            |  |
| N                                      |                                |                          |                    |                             |                            |            |            |  |
| Gender                                 | M                              | M                        | M                  | M                           | M                          | M          | M          |  |
| Age at transplant                      | 65                             | 55                       | 62                 | 60                          | 64                         | 51         | 51         |  |
| Height (cm)                            | 168                            | 168                      | 162                | 167                         | 176                        | 172        | 177        |  |
| Weight                                 | 65                             | 73                       | 52                 | 72                          | 75                         | 81         | 77         |  |
| Pirfenidone (2403mg/day) starting date | N.A.                           | N.A.                     | N.A.               | N.A.                        | 30.04.2013                 | 26.03.2013 | 11.06.2013 |  |
| Time of transplant                     | 06.07.2010                     | 26.06.2012               | 11.11.2012         | 02.05.2013                  | 23.08.2013                 | 30.09.2013 | 04.07.2014 |  |
| Time of diagnosis                      | 01.10.2009                     | 01.12.2009               | 01.01.2011         | 01.07.2012                  | 18.12.2012                 | 01.11.2012 | 11.02.2013 |  |
| Smoking history (current/ex/non)       | ex                             |                          |                    |                             |                            |            |            |  |
| PY                                     | 20                             | 30                       | 30                 | 38                          | 20                         | 10         | 36         |  |
| <b>PFT</b>                             |                                |                          |                    |                             |                            |            |            |  |
| FEV <sub>1</sub> (%pred)               | 41                             | 66                       | 78                 | 81                          | 67                         | 49         | 48         |  |
| FEV <sub>1</sub> (L)                   | 1.16                           | 2.08                     | 1.98               | 2.61                        | 2.18                       | 1.64       | 1.74       |  |
| FVC (%pred)                            | 34                             | 61                       | 67                 | 100                         | 62                         | 44         | 51         |  |
| FVC (L)                                | 1.26                           | 2.38                     | 2.12               | 3.71                        | 2.58                       | 1.88       | 2.3        |  |
| TLC (%pred)                            | 34                             | 54                       | 70                 | 89                          | 48                         | 37         | 54         |  |
| TLC (L)                                | 1.31                           | 3.45                     | 3.91               | 5.56                        | 3.48                       | 2.5        | 3.92       |  |
| DLco (%pred)                           | 23                             | 22                       | 33                 | 30                          | 39                         | 30         | 28         |  |
| DLco (L)                               | 1.9                            | 1.97                     | 2.44               | NA                          | 3.68                       | 2.2        | 2.9        |  |
