# Supplementary material
Source: HighWire-hosted journal article supplement (https://erj.ersjournals.com/content/52/3/1702314)
Supplement: inline-supplementary-material-6 [file inline-supplementary-material-6.pdf]

**Supplementary table 1: Enriched pathway components of bleomycine induced pulmonary fibrosis in mouse. Significantly different metabolites (Student's t-test (unpaired, two-tailed) p-value  $\leq 0.05$ , intensity fold-change  $\geq 1.5$ ) of corresponding pathways are listed.**

| <b>Fibrosis vs. Control</b>                 |                                          |
|---------------------------------------------|------------------------------------------|
| <b>Reduced in fibrosis</b>                  |                                          |
| <b>Pathways</b>                             | <b>Metabolites</b>                       |
| Glycolysis / Gluconeogenesis                | Phosphoenolpyruvate                      |
|                                             | 3-Phospho-D-glycerate                    |
|                                             | 3-Phospho-D-glyceroyl phosphate          |
|                                             | 2-Phospho-D-glycerate                    |
|                                             | 2,3-Bisphospho-D-glycerate               |
| <b>Enhanced in fibrosis</b>                 |                                          |
| <b>Pathways</b>                             | <b>Metabolites</b>                       |
| Amino sugar and nucleotide sugar metabolism | UDP-N-acetyl-alpha-D-glucosamine         |
|                                             | D-Glucose 1-phosphate                    |
|                                             | UDP-glucuronate                          |
|                                             | UDP-N-acetyl-D-galactosamine             |
|                                             | D-Mannose 6-phosphate                    |
|                                             | N-Acetyl-D-glucosamine 6-phosphate       |
|                                             | UDP-D-galacturonate                      |
|                                             | D-Mannose 1-phosphate                    |
|                                             | UDP-N-acetyl-D-mannosamine               |
|                                             | UDP-L-iduronate                          |
|                                             | beta-L-Arabinose 1-phosphate             |
|                                             | N-Acetyl-D-mannosamine 6-phosphate       |
|                                             | N-Acetyl-alpha-D-glucosamine 1-phosphate |
| Pentose and glucuronate interconversions    | D-Glucose 1-phosphate                    |
|                                             | UDP-glucuronate                          |
|                                             | D-Ribulose 5-phosphate                   |
|                                             | D-Xylulose 5-phosphate                   |
|                                             | D-Mannonate                              |
|                                             | L-Gulonate                               |
|                                             | D-Altronate                              |
|                                             | L-Ribulose 5-phosphate                   |
|                                             | 5-Dehydro-4-deoxy-D-glucuronate          |
|                                             | (4S)-4,6-Dihydroxy-2,5-dioxohexanoate    |
|                                             | L-Xylulose 1-phosphate                   |
| L-Galactonate                               |                                          |
| Ascorbate and aldarate metabolism           | Ascorbate                                |
|                                             | UDP-glucuronate                          |
|                                             | D-Xylulose 5-phosphate                   |
|                                             | L-Gulonate                               |
|                                             | L-Ribulose 5-phosphate                   |
|                                             | D-Glucuronolactone                       |
|                                             | L-xylulose-Hexulonolactone               |
|                                             | beta-L-Galactose 1-phosphate             |
|                                             | L-Galactonate                            |
| L-Ascorbate 6-phosphate                     |                                          |
| Pentose phosphate pathway                   | D-Ribose 5-phosphate                     |
|                                             | D-Ribulose 5-phosphate                   |
|                                             | D-Xylulose 5-phosphate                   |
|                                             | D-Gluconic acid                          |
|                                             | alpha-D-Ribose 1-phosphate               |
|                                             | beta-D-Glucose 6-phosphate               |

|                                                       |                                   |
|-------------------------------------------------------|-----------------------------------|
|                                                       | D-arabino-Hex-3-ulose 6-phosphate |
| Fructose and mannose metabolism                       | D-Mannose 6-phosphate             |
|                                                       | D-Mannose 1-phosphate             |
|                                                       | D-Fructose 1-phosphate            |
|                                                       | Sorbose 1-phosphate               |
|                                                       | beta-D-Fructose 2-phosphate       |
| <b>Pirfenidone treatment vs. non-treated fibrosis</b> |                                   |
| <b>Reduced after pirfenidone treatment</b>            |                                   |
| <b>Pathways</b>                                       | <b>Metabolites</b>                |
| Ascorbate and aldarate metabolism                     | Ascorbate                         |
|                                                       | Monodehydroascorbate              |
|                                                       | D-Glucuronolactone                |
|                                                       | L-xylo-Hexulonolactone            |

**Supplementary table 2: Enriched pathway components of human IPF samples. Significantly different metabolites (Student's t-test (unpaired, two-tailed) p-value  $\leq 0.05$ , intensity fold-change  $\geq 1.5$ ) of corresponding pathways are listed.**

| <b>Human IPF vs. normal</b>                      |                                                          |
|--------------------------------------------------|----------------------------------------------------------|
| <b>Reduced in human IPF</b>                      |                                                          |
| <b>Pathways</b>                                  | <b>Metabolites</b>                                       |
| Linoleic acid metabolism                         | Phosphatidylcholine                                      |
|                                                  | 13(S)-HODE                                               |
|                                                  | 9(S)-HODE                                                |
|                                                  | 9(10)-EpOME                                              |
|                                                  | 12(13)-EpOME                                             |
| Inositol phosphate metabolism                    | 1D-myo-Inositol 1,4-bisphosphate                         |
|                                                  | 1D-myo-Inositol 1,3,4-trisphosphate                      |
|                                                  | D-myo-Inositol 1,4,5-trisphosphate                       |
|                                                  | D-myo-Inositol 1,3-bisphosphate                          |
|                                                  | D-myo-Inositol 3,4-bisphosphate                          |
| Starch and sucrose metabolism                    | UDP-glucuronate                                          |
|                                                  | UDP-D-galacturonate                                      |
|                                                  | alpha-D-Glucose 1,6-bisphosphate                         |
| <b>Enhanced in human IPF</b>                     |                                                          |
| <b>Pathways</b>                                  | <b>Metabolites</b>                                       |
| Pentose and glucuronate interconversions         | D-Glucuronate                                            |
|                                                  | D-Galacturonate                                          |
|                                                  | D-Lyxose                                                 |
|                                                  | D-Mannonate                                              |
|                                                  | D-Tagaturonate                                           |
|                                                  | 3-Dehydro-L-gulonate                                     |
|                                                  | L-Gulonate                                               |
|                                                  | D-Altronate                                              |
|                                                  | D-Fructuronate                                           |
|                                                  | L-Galactonate                                            |
| Ascorbate and aldarate metabolism                | D-Glucuronate                                            |
|                                                  | D-Galacturonate                                          |
|                                                  | 3-Dehydro-L-gulonate                                     |
|                                                  | L-Gulonate                                               |
|                                                  | Dehydroascorbate                                         |
|                                                  | L-Galactonate                                            |
| Vitamin B6 metabolism                            | 4-Pyridoxate                                             |
|                                                  | 2-(Hydroxymethyl)-3-(acetamidomethylene)succinate        |
|                                                  | 3-Hydroxy-4-hydroxymethyl-2-methylpyridine-5-carboxylate |
|                                                  | 3-Amino-2-oxopropyl phosphate                            |
| Fructose and mannose metabolism                  | L-Fuculose 1-phosphate                                   |
|                                                  | L-Rhamnulose 1-phosphate                                 |
|                                                  | L-Fucose 1-phosphate                                     |
| <b>Pirfenidone treatment vs. non-treated IPF</b> |                                                          |
| <b>Enhanced after pirfenidone treatment</b>      |                                                          |
| <b>Pathways</b>                                  | <b>Metabolites</b>                                       |
| Glycolysis / Gluconeogenesis                     | 3-Phospho-D-glycerate                                    |
|                                                  | 2-Phospho-D-glycerate                                    |
